# Supplementary material
Source: Springer Nature journal article supplement (https://www.springermedizin.de/resource/supplementary/12967_2008_268_MOESM3_ESM.pdf/9576072)

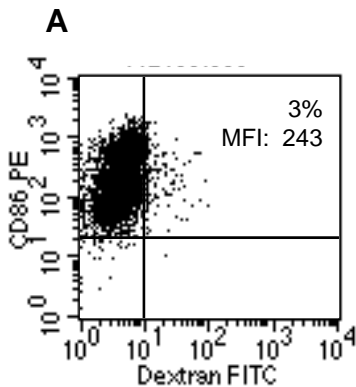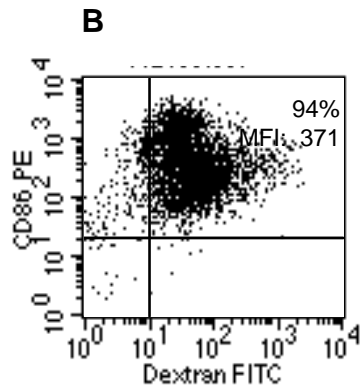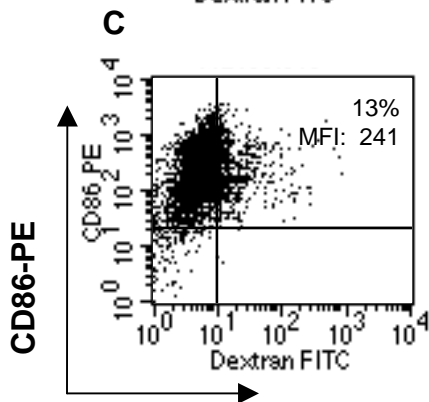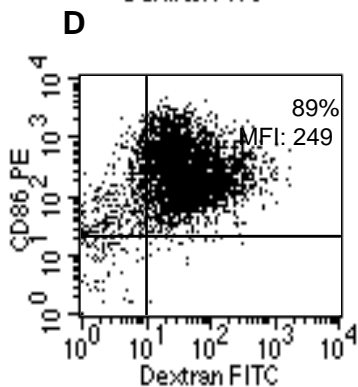

**DX-FITC**

Supplement: MOESM3 [file 9576072]
